# Supplementary material
Source: PubMed Central journal article supplement (PMC3527244)
Supplement: 0c772567f02832bec986f3a37782375a_genetics.112.146357-9.pdf [file 0c772567f02832bec986f3a37782375a_genetics.112.146357-9.pdf]

### Supplemental Figure 1a

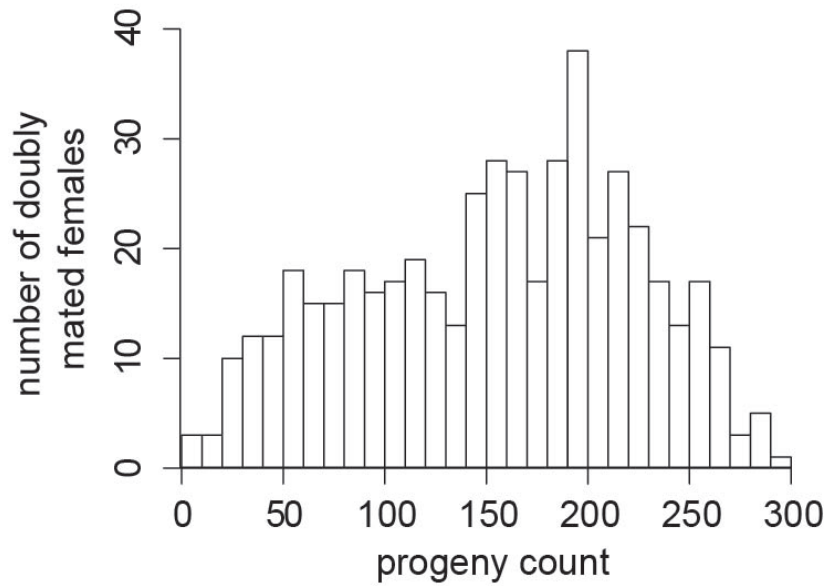

### Supplemental Figure 1b

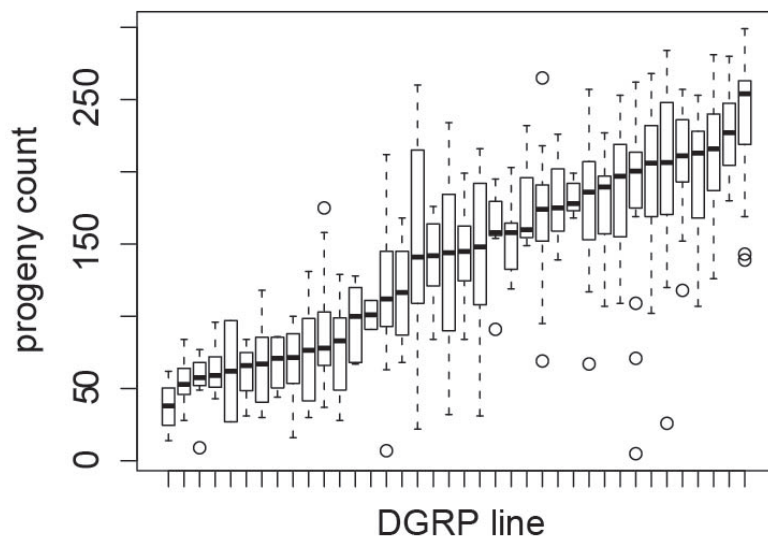

**Figure S1** Progeny counts. (a) Histogram showing the distribution of progeny counts from all doubly-mated females. (b) There is a significant effect of DGRP female phenotype in progeny count ( $P < 3.92 \times 10^{-13}$ ). See Supplemental Table 1 for line numbers.
