# Supplementary material
Source: PubMed Central journal article supplement (PMC3527244)
Supplement: 5f8adc3d73609739f6a37dbd57951e6d_genetics.112.146357-4.pdf [file 5f8adc3d73609739f6a37dbd57951e6d_genetics.112.146357-4.pdf]

**Table S2 Genes with SNPs associated with progeny count**

| rank order* | Gene      | chrs | position |            | P-value <sup>#</sup> |
|-------------|-----------|------|----------|------------|----------------------|
| 1           | ssp3      | 2L   | 18933865 | intronic   | 1.77E-07             |
| 2           | ena       | 2R   | 15049085 | synonymous | 4.48E-06             |
| 3           | mamo      | X    | 13823859 | intronic   | 5.95E-06             |
| 4           | Sr-CI     | 2L   | 4126958  | downstream | 7.27E-06             |
| 5           | GalNAc-T1 | 2R   | 11398750 | upstream   | 7.74E-06             |
| 6           | lr52d     | 2R   | 11398750 | downstream | 7.74E-06             |
| 7           | Sema-1a   | 2L   | 8632293  | intronic   | 8.63E-06             |
| 8           | Samuel    | 2L   | 11054465 | intronic   | 8.92E-06             |

\* rank order of the most significant associated SNP in a particular gene.

<sup>#</sup> P-value cutoff of  $P < 10^{-6}$
