# Supplementary material
Source: PubMed Central journal article supplement (PMC3527244)
Supplement: 4281199462537c6d6d103b0695ac9155_genetics.112.146357-2.pdf [file 4281199462537c6d6d103b0695ac9155_genetics.112.146357-2.pdf]

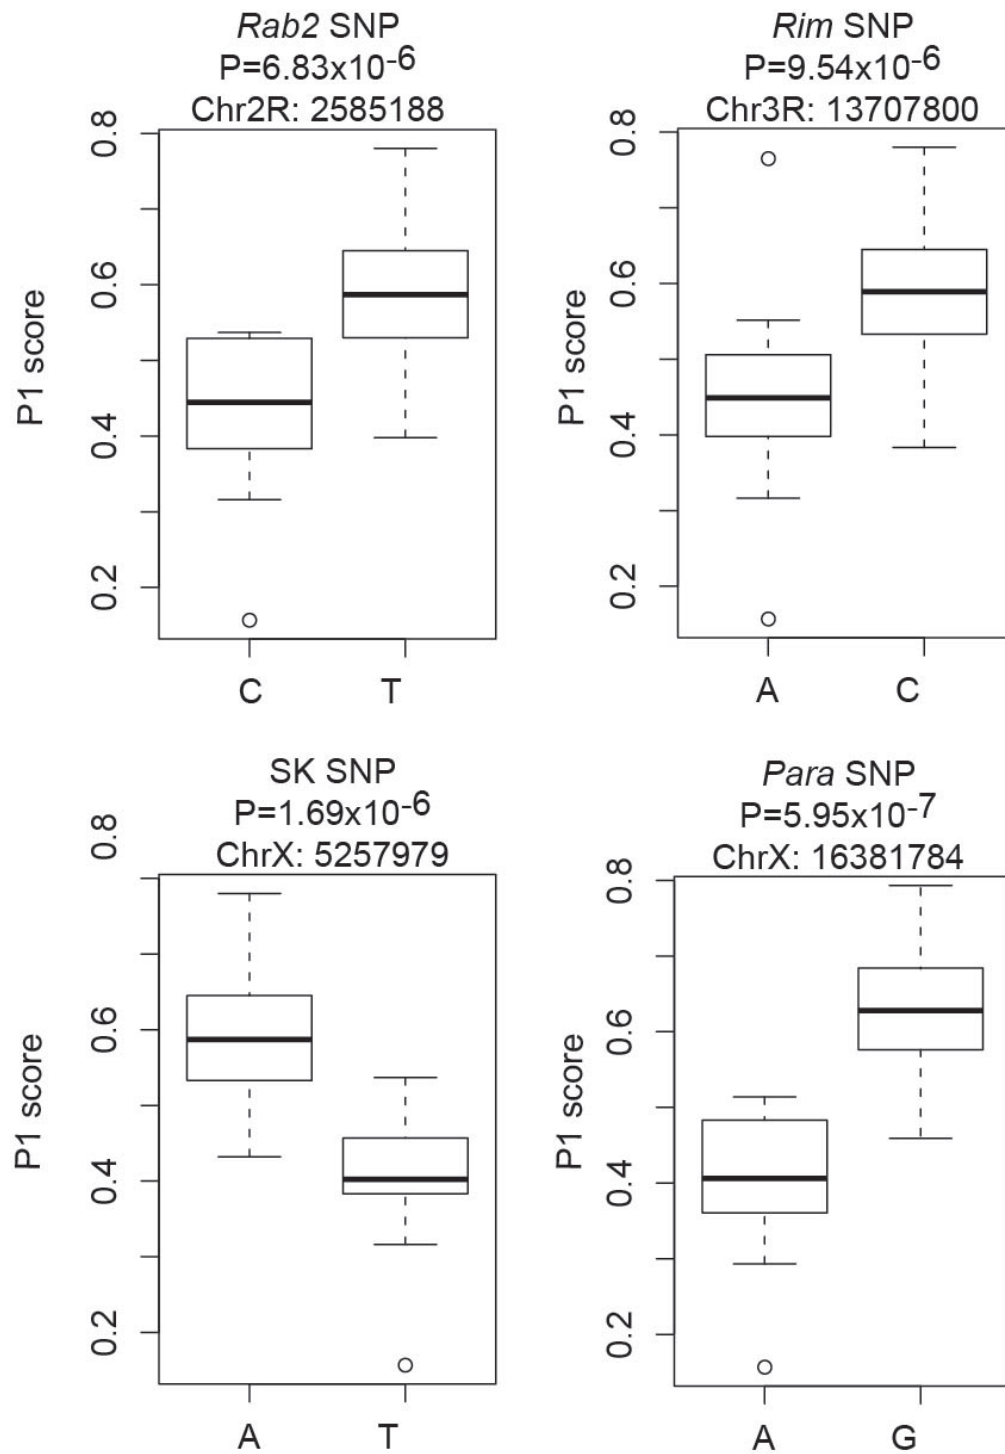

**Figure S4** SNP effects for genes functionally tested. Box plots of the most significant SNP associations in the four genes functionally tested. For each SNP, the lines are partitioned into two groups representing each allele. The individual box plots represent the P1 scores for the lines carrying the particular allele listed on the X-axis.
