# Supplementary material
Source: PubMed Central journal article supplement (PMC3527244)
Supplement: d31ffd7a0fbd2468b40d0598d292ac22_genetics.112.146357-6.pdf [file d31ffd7a0fbd2468b40d0598d292ac22_genetics.112.146357-6.pdf]

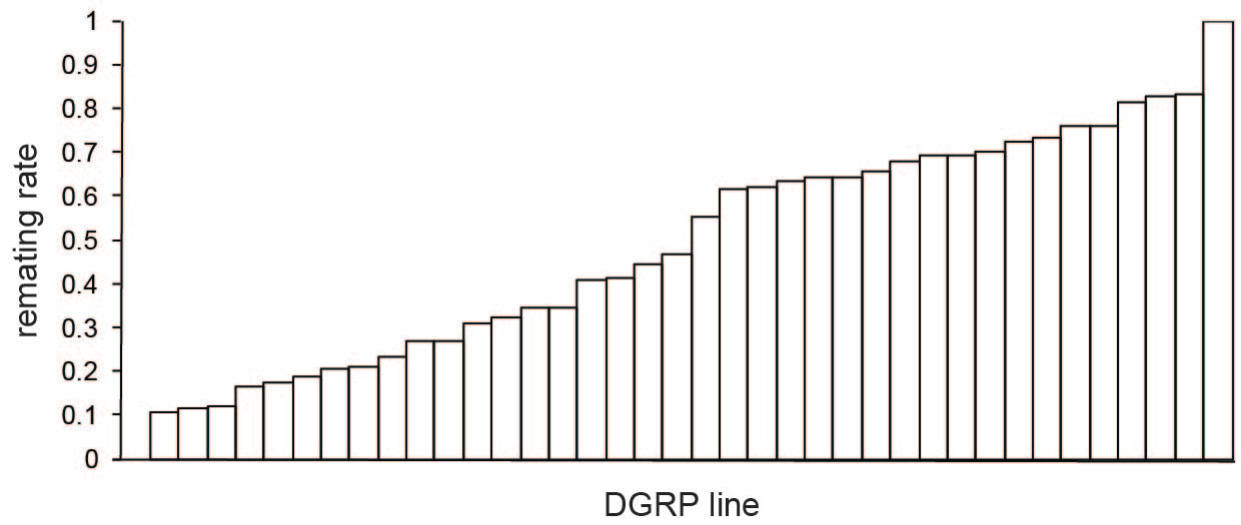

**Figure S2** Remating rate. There is a significant effect of DGRP female genotype on remating rate ( $P=0.003$ ). Remating rate is the proportion of females that mated twice ( $N=30$  for each line). See Table S1 for line numbers.
