# Supplementary material
Source: PubMed Central journal article supplement (PMC3527244)
Supplement: e1c12d1df832ae27f5c383fec53d383f_genetics.112.146357-10.pdf [file e1c12d1df832ae27f5c383fec53d383f_genetics.112.146357-10.pdf]

**Table S3** Genes with SNPs associated with remating rate

| rank order* | Gene    | chrs | position |            | P-value <sup>#</sup> |
|-------------|---------|------|----------|------------|----------------------|
| 1           | Gr28b   | 2L   | 7456217  | synonymous | 1.34E-06             |
| 2           | gish    | 3R   | 12113328 | intronic   | 1.35E-06             |
| 3           | CG11883 | 2R   | 6527136  | synonymous | 3.61E-06             |
| 4           | CG2816  | 2L   | 3703331  | intergenic | 4.06E-06             |
| 5           | CG43145 | 2L   | 3703331  | intergenic | 4.06E-06             |
| 6           | Gr28b   | 2L   | 7456118  | synonymous | 5.00E-06             |
| 7           | Zfrp8   | 2R   | 20021812 | intronic   | 5.45E-06             |
| 8           | kirre   | X    | 3020302  | intronic   | 5.99E-06             |
| 9           | CG11034 | 2L   | 5809499  | intergenic | 6.53E-06             |
| 10          | sr      | 3R   | 13942698 | intronic   | 6.63E-06             |

\* rank order of the most significant associated SNP in a particular gene.

<sup>#</sup> P-value cutoff of  $P < 10^{-6}$
