# Supplementary material
Source: PubMed Central journal article supplement (PMC3527244)
Supplement: e87c20648f42a43a36af3a2b0847c032_genetics.112.146357-7.pdf [file e87c20648f42a43a36af3a2b0847c032_genetics.112.146357-7.pdf]

**Table S1 Phenotypes measured in the DGRP lines**

| <b>line</b>   | <b>P1*</b> | <b>progeny*</b> | <b>remate</b> |
|---------------|------------|-----------------|---------------|
| <b>RAL208</b> | 0.56       | 236.36          | 0.73          |
| <b>RAL301</b> | 0.53       | 208.25          | 0.70          |
| <b>RAL303</b> | 0.62       | 179.50          | 0.63          |
| <b>RAL304</b> | 0.61       | 197.86          | 0.81          |
| <b>RAL306</b> | 0.48       | 68.00           | 0.17          |
| <b>RAL307</b> | 0.77       | 96.60           | 0.35          |
| <b>RAL313</b> | NA         | NA              | 0.00          |
| <b>RAL315</b> | 0.40       | 60.33           | 0.12          |
| <b>RAL324</b> | 0.59       | 202.71          | 0.83          |
| <b>RAL335</b> | 0.64       | 227.50          | 0.55          |
| <b>RAL357</b> | 0.32       | 117.87          | 0.64          |
| <b>RAL358</b> | 0.38       | 182.00          | 0.17          |
| <b>RAL360</b> | 0.50       | 66.75           | 0.64          |
| <b>RAL362</b> | 0.43       | 187.64          | 0.69          |
| <b>RAL365</b> | 0.51       | 213.32          | 0.83          |
| <b>RAL375</b> | 0.72       | 167.59          | 0.62          |
| <b>RAL379</b> | 0.65       | 90.29           | 0.68          |
| <b>RAL380</b> | 0.38       | 144.00          | 0.69          |
| <b>RAL391</b> | 0.57       | 183.55          | 0.72          |
| <b>RAL399</b> | 0.65       | 159.13          | 0.27          |
| <b>RAL427</b> | 0.60       | 177.14          | 0.76          |
| <b>RAL437</b> | 0.53       | 67.42           | 0.44          |
| <b>RAL486</b> | 0.65       | 37.58           | 0.41          |
| <b>RAL514</b> | 0.54       | 180.33          | 0.21          |
| <b>RAL517</b> | 0.71       | 118.36          | 0.47          |
| <b>RAL555</b> | 0.52       | 75.13           | 0.62          |
| <b>RAL639</b> | 0.55       | 54.33           | 0.41          |
| <b>RAL705</b> | 0.46       | 55.13           | 0.27          |
| <b>RAL707</b> | 0.45       | 64.20           | 0.21          |
| <b>RAL712</b> | 0.54       | 77.60           | 0.19          |
| <b>RAL714</b> | 0.56       | 200.36          | 1.00          |
| <b>RAL730</b> | 0.16       | 62.00           | 0.11          |
| <b>RAL732</b> | 0.70       | 139.00          | 0.66          |
| <b>RAL765</b> | 0.59       | 153.00          | 0.23          |
| <b>RAL774</b> | 0.53       | 138.45          | 0.76          |
| <b>RAL786</b> | 0.41       | 153.43          | 0.32          |
| <b>RAL799</b> | 0.54       | 101.00          | 0.12          |
| <b>RAL820</b> | 0.78       | 143.78          | 0.31          |
| <b>RAL852</b> | 0.60       | 179.44          | 0.34          |

\*mean values
