# Supplementary material
Source: PubMed Central journal article supplement (PMC3527244)
Supplement: e94b35072b49ee009066630562b55563_genetics.112.146357-1.pdf [file e94b35072b49ee009066630562b55563_genetics.112.146357-1.pdf]

### Supplemental Figure 1a

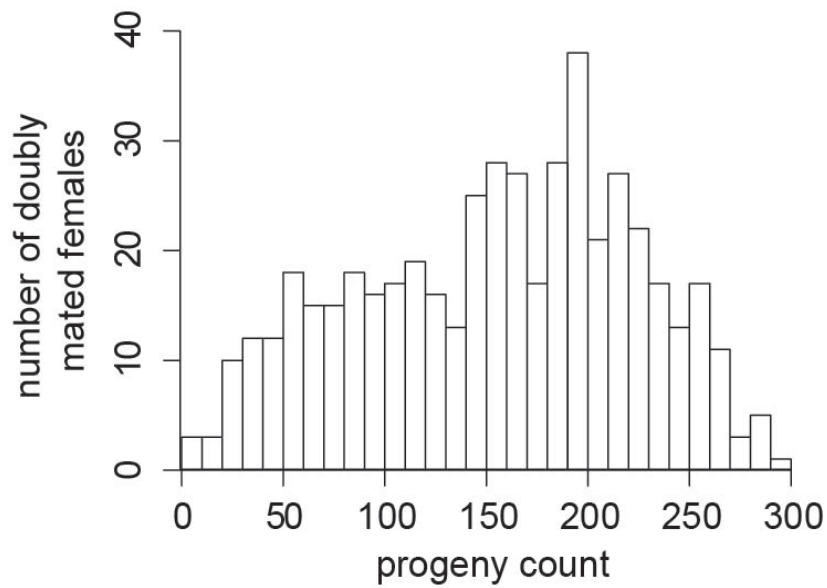

### Supplemental Figure 1b

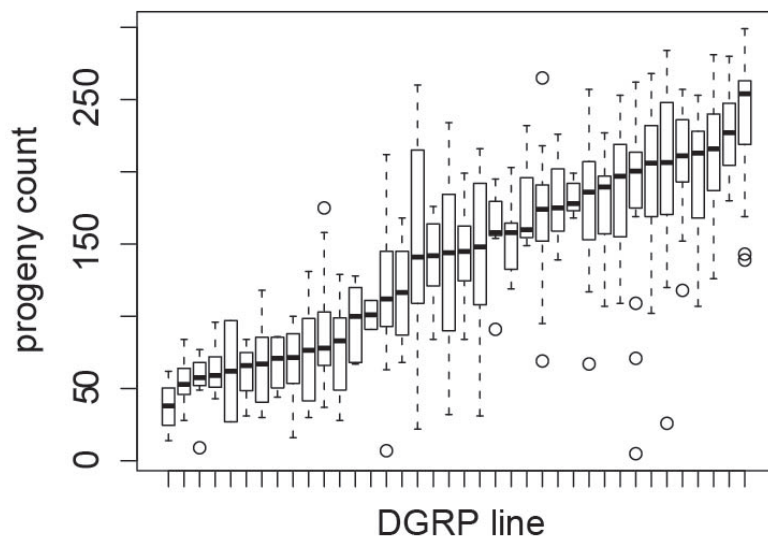

**Figure S1** Progeny counts. (a) Histogram showing the distribution of progeny counts from all doubly-mated females. (b) There is a significant effect of DGRP female phenotype in progeny count ( $P < 3.92 \times 10^{-13}$ ). See Table S1 for line numbers.

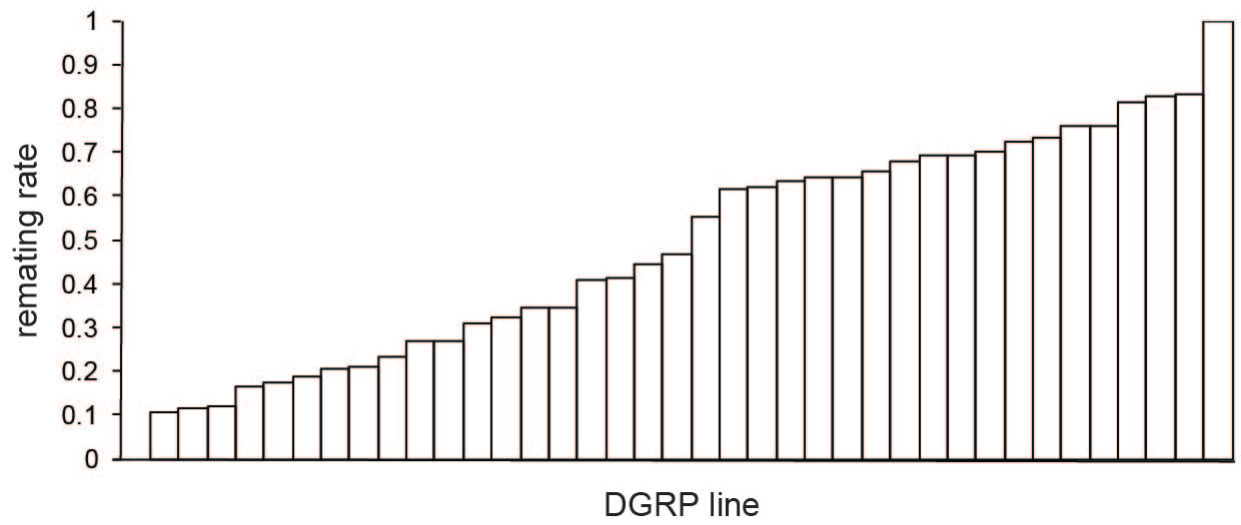

**Figure S2** Remating rate. There is a significant effect of DGRP female genotype on remating rate ( $P=0.003$ ). Remating rate is the proportion of females that mated twice ( $N=30$  for each line). See Table S1 for line numbers.

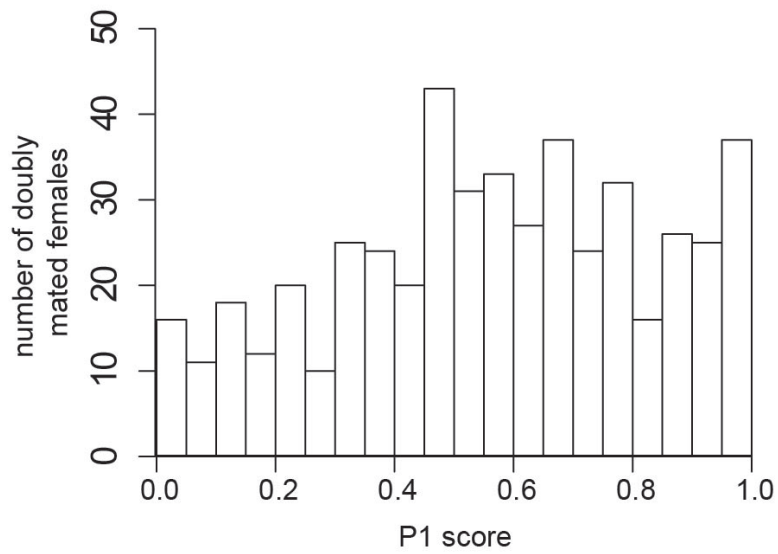

**Figure S3** P1 Scores. Histogram of the distribution of P1 scores from all doubly-mated females.

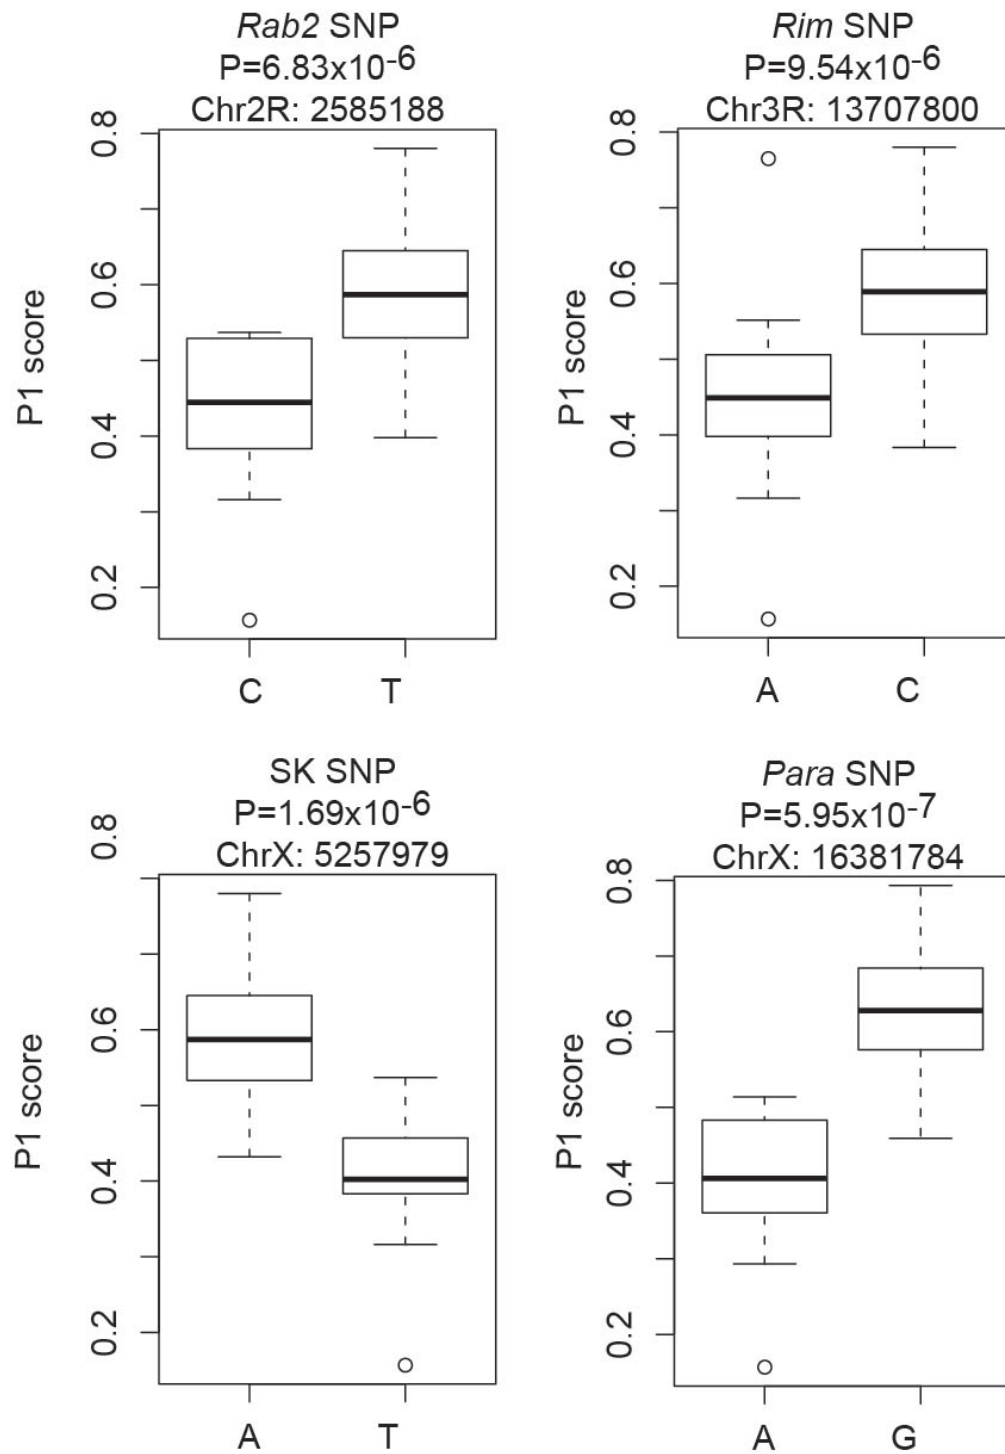

**Figure S4** SNP effects for genes functionally tested. Box plots of the most significant SNP associations in the four genes functionally tested. For each SNP, the lines are partitioned into two groups representing each allele. The individual box plots represent the P1 scores for the lines carrying the particular allele listed on the X-axis.

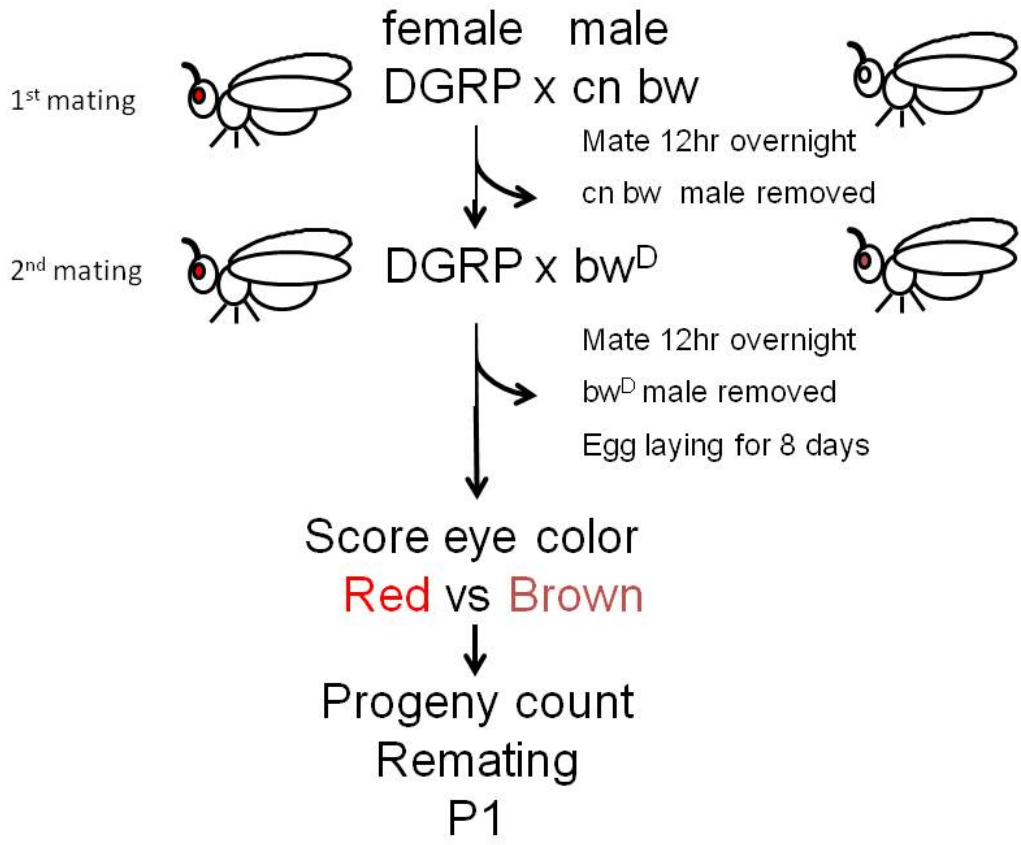

P1 – proportion of 1st male progeny, after 2<sup>nd</sup> mating

**Figure S5** Crossing scheme employed in this study. Eye colors are indicated in the cartoon flies. See methods for complete details.

**Table S1 Phenotypes measured in the DGRP lines**

| <b>line</b>   | <b>P1*</b> | <b>progeny*</b> | <b>remate</b> |
|---------------|------------|-----------------|---------------|
| <b>RAL208</b> | 0.56       | 236.36          | 0.73          |
| <b>RAL301</b> | 0.53       | 208.25          | 0.70          |
| <b>RAL303</b> | 0.62       | 179.50          | 0.63          |
| <b>RAL304</b> | 0.61       | 197.86          | 0.81          |
| <b>RAL306</b> | 0.48       | 68.00           | 0.17          |
| <b>RAL307</b> | 0.77       | 96.60           | 0.35          |
| <b>RAL313</b> | NA         | NA              | 0.00          |
| <b>RAL315</b> | 0.40       | 60.33           | 0.12          |
| <b>RAL324</b> | 0.59       | 202.71          | 0.83          |
| <b>RAL335</b> | 0.64       | 227.50          | 0.55          |
| <b>RAL357</b> | 0.32       | 117.87          | 0.64          |
| <b>RAL358</b> | 0.38       | 182.00          | 0.17          |
| <b>RAL360</b> | 0.50       | 66.75           | 0.64          |
| <b>RAL362</b> | 0.43       | 187.64          | 0.69          |
| <b>RAL365</b> | 0.51       | 213.32          | 0.83          |
| <b>RAL375</b> | 0.72       | 167.59          | 0.62          |
| <b>RAL379</b> | 0.65       | 90.29           | 0.68          |
| <b>RAL380</b> | 0.38       | 144.00          | 0.69          |
| <b>RAL391</b> | 0.57       | 183.55          | 0.72          |
| <b>RAL399</b> | 0.65       | 159.13          | 0.27          |
| <b>RAL427</b> | 0.60       | 177.14          | 0.76          |
| <b>RAL437</b> | 0.53       | 67.42           | 0.44          |
| <b>RAL486</b> | 0.65       | 37.58           | 0.41          |
| <b>RAL514</b> | 0.54       | 180.33          | 0.21          |
| <b>RAL517</b> | 0.71       | 118.36          | 0.47          |
| <b>RAL555</b> | 0.52       | 75.13           | 0.62          |
| <b>RAL639</b> | 0.55       | 54.33           | 0.41          |
| <b>RAL705</b> | 0.46       | 55.13           | 0.27          |
| <b>RAL707</b> | 0.45       | 64.20           | 0.21          |
| <b>RAL712</b> | 0.54       | 77.60           | 0.19          |
| <b>RAL714</b> | 0.56       | 200.36          | 1.00          |
| <b>RAL730</b> | 0.16       | 62.00           | 0.11          |
| <b>RAL732</b> | 0.70       | 139.00          | 0.66          |
| <b>RAL765</b> | 0.59       | 153.00          | 0.23          |
| <b>RAL774</b> | 0.53       | 138.45          | 0.76          |
| <b>RAL786</b> | 0.41       | 153.43          | 0.32          |
| <b>RAL799</b> | 0.54       | 101.00          | 0.12          |
| <b>RAL820</b> | 0.78       | 143.78          | 0.31          |
| <b>RAL852</b> | 0.60       | 179.44          | 0.34          |

\*mean values

**Table S2 Genes with SNPs associated with progeny count**

| rank order* | Gene      | chrs | position |            | P-value <sup>#</sup> |
|-------------|-----------|------|----------|------------|----------------------|
| 1           | ssp3      | 2L   | 18933865 | intronic   | 1.77E-07             |
| 2           | ena       | 2R   | 15049085 | synonymous | 4.48E-06             |
| 3           | mamo      | X    | 13823859 | intronic   | 5.95E-06             |
| 4           | Sr-CI     | 2L   | 4126958  | downstream | 7.27E-06             |
| 5           | GalNAc-T1 | 2R   | 11398750 | upstream   | 7.74E-06             |
| 6           | lr52d     | 2R   | 11398750 | downstream | 7.74E-06             |
| 7           | Sema-1a   | 2L   | 8632293  | intronic   | 8.63E-06             |
| 8           | Samuel    | 2L   | 11054465 | intronic   | 8.92E-06             |

\* rank order of the most significant associated SNP in a particular gene.

<sup>#</sup> P-value cutoff of  $P < 10^{-6}$

**Table S3 Genes with SNPs associated with remating rate**

| rank order* | Gene    | chrs | position |            | P-value <sup>#</sup> |
|-------------|---------|------|----------|------------|----------------------|
| 1           | Gr28b   | 2L   | 7456217  | synonymous | 1.34E-06             |
| 2           | gish    | 3R   | 12113328 | intronic   | 1.35E-06             |
| 3           | CG11883 | 2R   | 6527136  | synonymous | 3.61E-06             |
| 4           | CG2816  | 2L   | 3703331  | intergenic | 4.06E-06             |
| 5           | CG43145 | 2L   | 3703331  | intergenic | 4.06E-06             |
| 6           | Gr28b   | 2L   | 7456118  | synonymous | 5.00E-06             |
| 7           | Zfrp8   | 2R   | 20021812 | intronic   | 5.45E-06             |
| 8           | kirre   | X    | 3020302  | intronic   | 5.99E-06             |
| 9           | CG11034 | 2L   | 5809499  | intergenic | 6.53E-06             |
| 10          | sr      | 3R   | 13942698 | intronic   | 6.63E-06             |

\* rank order of the most significant associated SNP in a particular gene.

<sup>#</sup> P-value cutoff of  $P < 10^{-6}$



**Table S4 All associated SNPs with a nominal  $P \leq 0.05$**

Available for download at <http://www.genetics.org/lookup/suppl/doi:10.1534/genetics.112.146357/-/DC1> as a csv file.
