# Supplementary material
Source: PubMed Central journal article supplement (PMC3527244)
Supplement: fdd895c76d72dfa8a7205693d7aff9e4_genetics.112.146357-8.pdf [file fdd895c76d72dfa8a7205693d7aff9e4_genetics.112.146357-8.pdf]

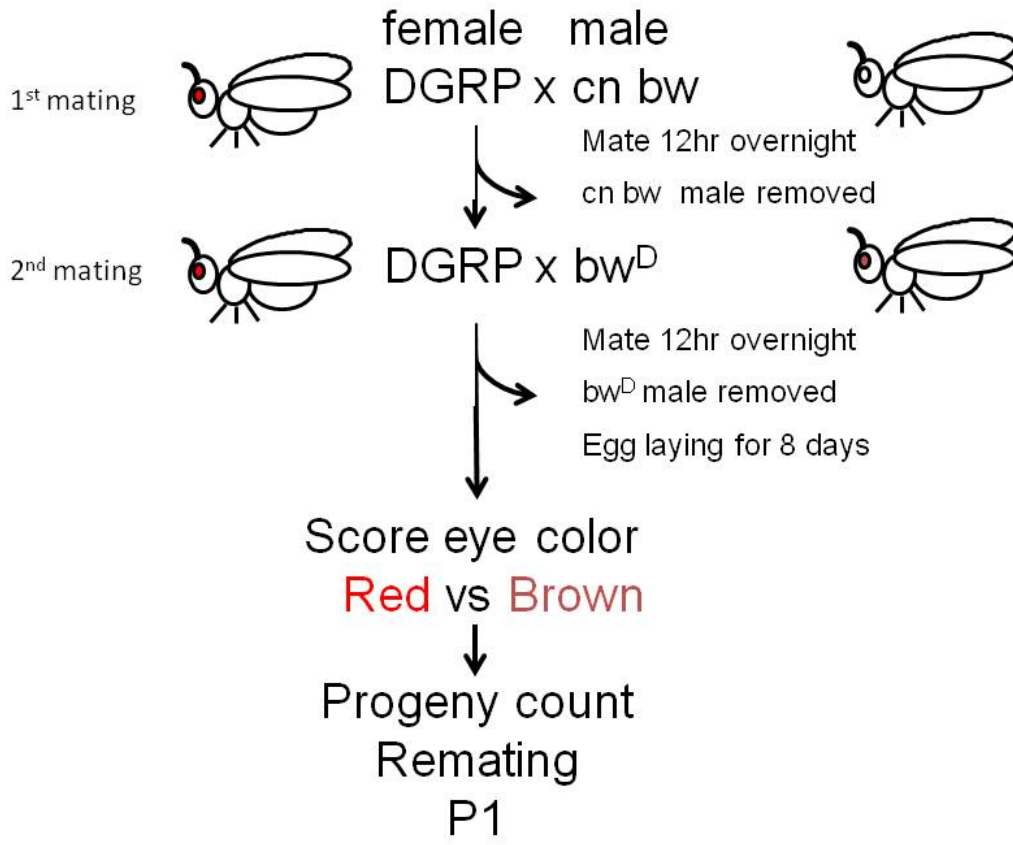

P1 – proportion of 1st male progeny, after 2<sup>nd</sup> mating

**Figure S5** Crossing scheme employed in this study. Eye colors are indicated in the cartoon flies. See methods for complete details.
