# Supplementary material
Source: PubMed Central journal article supplement (PMC3527244)

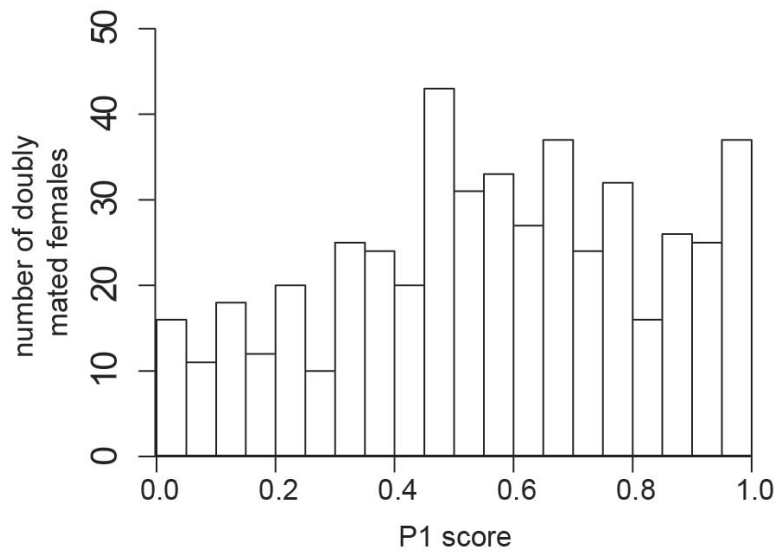

**Figure S3** P1 Scores. Histogram of the distribution of P1 scores from all doubly-mated females.

Supplement: ed6eb275fc6729aa6e56017af44b3cca_genetics.112.146357-5.pdf [file ed6eb275fc6729aa6e56017af44b3cca_genetics.112.146357-5.pdf]
